# Supplementary material for: One Health Approach to Zoonotic Parasites: Molecular Detection of Intestinal Protozoans in an Urban Population of Norway Rats, Rattus norvegicus, in Barcelona, Spain
Source: PubMed Central journal article supplement (PMC7998591; doi:10.3390/pathogens10030311), 2021-03-07
Supplement: pathogens-10-00311-s001.pdf [file pathogens-10-00311-s001.pdf]

**Table S1.** Allplex™ GI-parasites Assay multiplex PCR results for the 82 positive rats analysed. *Bh*, *Blastocystis*; *Gd*, *Giardia duodenalis*; *Df*, *Dientamoeba fragilis*; *Cr*, *Cryptosporidium*. Ct, cycle threshold. Cutoff established: positive result, Ct <43; negative result, Ct ≥43. C-, negative control; C+, positive control.

| Rat nº | <i>Bh</i> Ct | <i>Gd</i> Ct | <i>Df</i> Ct | <i>Cr</i> Ct |
|--------|--------------|--------------|--------------|--------------|
| 1      | 37.31        | -            | -            | 37.42        |
| 2      | 31.27        | 35.52        | 38.45        | 35.70        |
| 3      | 37.23        | 38.01        | -            | 38.93        |
| 4      | 36.38        | -            | -            | -            |
| 5      | 39.73        | 38.14        | -            | -            |
| 7      | -            | 39.32        | -            | -            |
| 8      | -            | 38.68        | -            | -            |
| 9      | 34.22        | 38.29        | -            | 40.19        |
| 10     | 38.30        | 37.80        | -            | -            |
| 11     | -            | -            | 35.59        | -            |
| 12     | 36.19        | 37.93        | 36.43        | 39.88        |
| 13     | 38.07        | -            | -            | -            |
| 14     | 34.63        | 38.13        | 37.74        | -            |
| 15     | 36.08        | 35.65        | 40.41        | 38.27        |
| 16     | 35.72        | -            | 39.76        | -            |
| 17     | 37.06        | -            | -            | -            |
| 18     | 35.26        | 38.92        | 38.94        | -            |
| 19     | 38.37        | -            | -            | -            |
| 22     | 38.89        | -            | -            | -            |
| 23     | 39.29        | -            | -            | -            |
| 24     | 38.11        | -            | -            | -            |
| 25     | 38.88        | -            | -            | -            |
| 27     | 39.72        | -            | -            | -            |
| 28     | 40.94        | -            | -            | -            |
| 29     | 39.99        | 38.74        | -            | -            |
| 31     | 32.92        | 34.36        | -            | 40.31        |
| 32     | -            | -            | -            | 39.98        |
| 33     | 39.76        | 38.89        | -            | -            |
| 34     | 39.57        | -            | -            | -            |
| 35     | 38.83        | -            | -            | 38.22        |
| 36     | 38.04        | 38.40        | -            | 36.25        |
| 37     | 31.46        | -            | -            | -            |
| 38     | 39.93        | -            | -            | -            |
| 39     | 38.08        | 39.80        | -            | -            |
| 40     | 39.02        | -            | -            | -            |
| 41     | 34.22        | -            | 40.92        | 40.07        |
| 42     | 37.54        | 36.81        | -            | -            |
| 43     | 37.56        | -            | -            | -            |
| 45     | 33.75        | 35.65        | -            | 37.11        |
| 46     | 34.45        | 36.82        | -            | 37.58        |
| 47     | 31.34        | -            | 39.69        | -            |
| 48     | 37.79        | -            | -            | -            |
| 49     | 30.57        | 37.44        | -            | -            |
| 50     | 25.29        | 40.07        | -            | 39.62        |

|           |              |              |              |              |
|-----------|--------------|--------------|--------------|--------------|
| 51        | 34.25        | 32.55        | 40.83        | -            |
| 52        | 39.95        | -            | -            | 36.76        |
| 53        | 30.33        | -            | -            | -            |
| 54        | 35.05        | -            | 39.29        | -            |
| 55        | 38.94        | -            | -            | -            |
| 56        | 34.20        | 38.73        | -            | 40.07        |
| 57        | 39.72        | -            | -            | -            |
| 58        | 36.68        | -            | -            | 38.55        |
| 61        | 40.65        | -            | -            | -            |
| 64        | 37.37        | 39.46        | -            | -            |
| 65        | 37.65        | 38.38        | -            | 39.98        |
| 68        | 39.21        | 40.13        | -            | 39.82        |
| 69        | 38.97        | -            | -            | 39.16        |
| 70        | 40.46        | -            | -            | -            |
| 71        | 36.00        | -            | -            | -            |
| 72        | 40.24        | 39.43        | -            | -            |
| 73        | 36.76        | 32.42        | -            | 38.84        |
| 75        | 37.17        | 38.19        | -            | 35.21        |
| 76        | 39.71        | -            | 38.38        | -            |
| 79        | 38.83        | 39.95        | -            | -            |
| 80        | 29.39        | -            | -            | 38.04        |
| 81        | -            | 37.47        | -            | -            |
| 82        | 38.84        | -            | -            | 36.71        |
| 83        | 39.17        | -            | -            | 33.05        |
| 84        | 32.76        | 36.57        | -            | 39.43        |
| 85        | 33.93        | -            | -            | 38.32        |
| 86        | 37.13        | -            | -            | -            |
| 88        | 35.59        | 39.82        | -            | -            |
| 89        | 39.35        | -            | -            | -            |
| 91        | 36.15        | -            | -            | -            |
| 92        | 37.25        | -            | -            | -            |
| 94        | 31.51        | 38.72        | -            | 37.54        |
| 95        | 36.24        | -            | -            | -            |
| 97        | 39.75        | -            | -            | -            |
| 98        | 31.48        | 36.17        | -            | 37.77        |
| 99        | 29.52        | -            | 37.32        | -            |
| 101       | 39.01        | -            | -            | -            |
| 102       | 38.10        | -            | -            | -            |
| <b>C-</b> | -            | -            | -            | -            |
| <b>C+</b> | <b>25.98</b> | <b>20.56</b> | <b>25.78</b> | <b>23.00</b> |
